# Supplementary material for: Buried interface modification by multifunctional ionic liquids for triple-cation perovskite solar cells made in a fully ambient air
Source: Royal Society of Chemistry journal article supplement (doi:10.1039/d4tc00254g), 2024-01-01
Supplement: d4tc00254g1.pdf [file d4tc00254g1.pdf]

## Supporting Information

### **Buried interface modification by multifunctional ionic liquid for triple-cation perovskite solar cells made in a fully-ambient air**

*Gangyi Zeng<sup>a</sup>, Guangyao Liu<sup>a</sup>, Tiantian Wang<sup>a</sup>, Lingling Wen<sup>a</sup>, Jiangning Li<sup>a</sup>, Yan  
Meng<sup>a</sup>, Ziqiu Ren<sup>b</sup>, Xin Li<sup>a</sup> \**

<sup>a</sup>MIIT Key Laboratory of Critical Materials Technology for New Energy Conversion and Storage, School of Chemistry and Chemical Engineering, State Key Lab of Urban Water Resource and Environment, Harbin Institute of Technology, Harbin 150090, P. R. China.

<sup>b</sup>Henan Institute of Advanced Technology, College of Chemistry, Zhengzhou University, Zhengzhou, 450052 P. R. China.

\*Corresponding author: Xin Li.

E-mail address: [lixin@hit.edu.cn](mailto:lixin@hit.edu.cn) (X. Li).

Number of Pages: 21

Number of Figures: 14

Number of Tables: 6

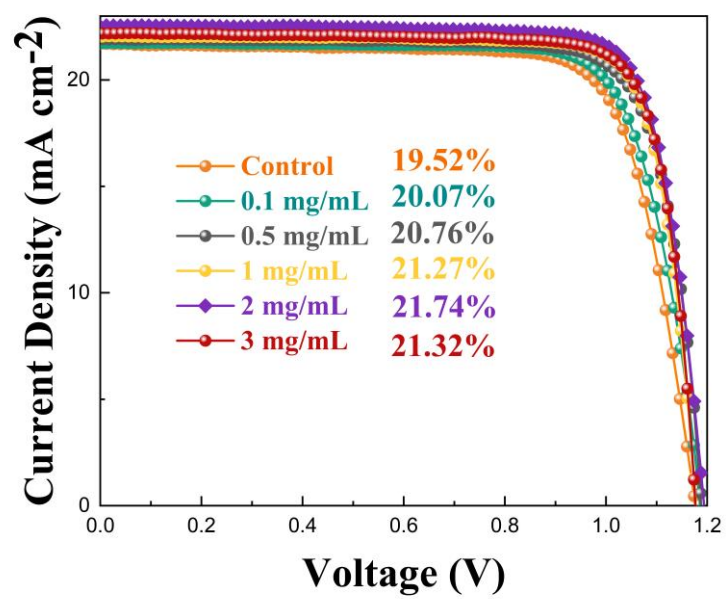

**Figure S1.** The champion PCE for devices with different BMIMPF<sub>6</sub> concentrations of 0.1, 0.5, 1, 2, and 3 mg/mL.

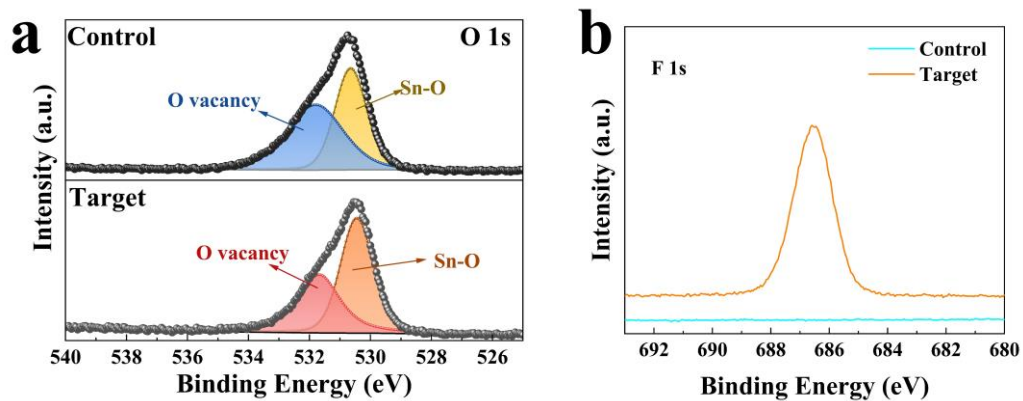

Figure S2. a) XPS of O 1s core-level spectra; b) XPS of F 1s core-level spectra.

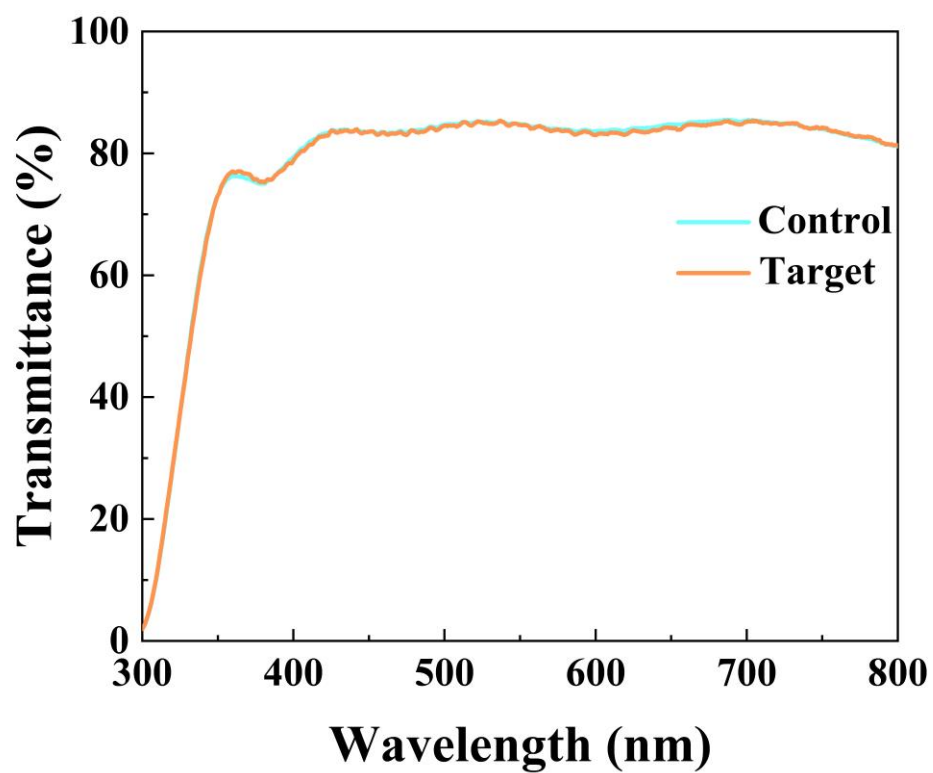

**Figure S3.** The light transmission of control and target SnO<sub>2</sub> films.

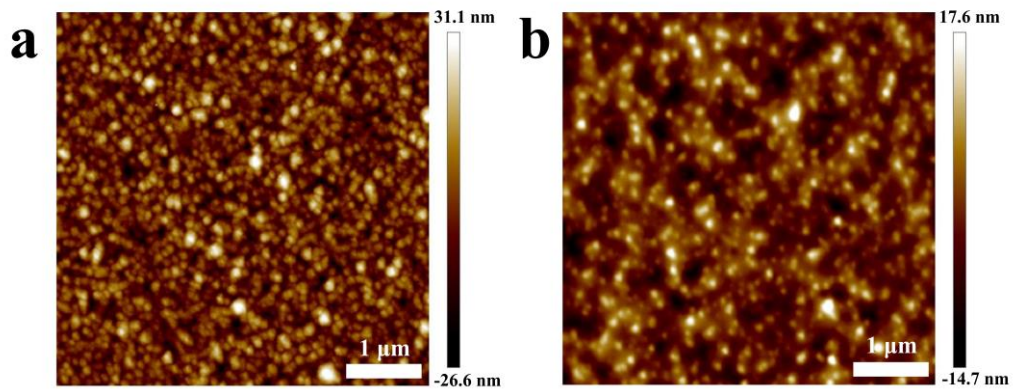

**Figure S4.** a) AFM image of control SnO<sub>2</sub> film; b) AFM image of control SnO<sub>2</sub> film with BMIMPF<sub>6</sub>.

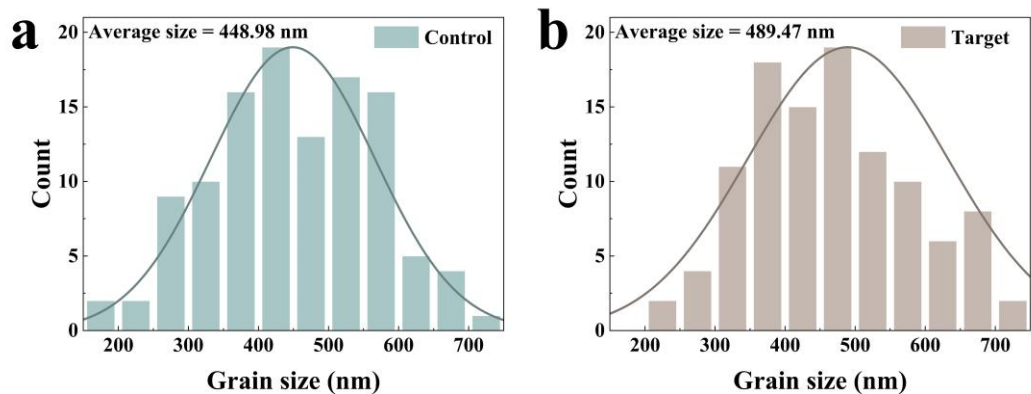

**Figure S5.** The distribution of grain size for a) control and b) target perovskite films.

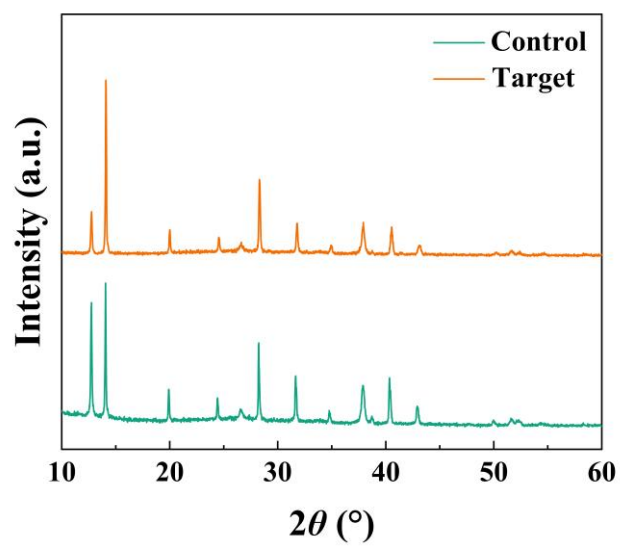

**Figure S6.** The XRD pattern for a) control and b) target perovskite films.

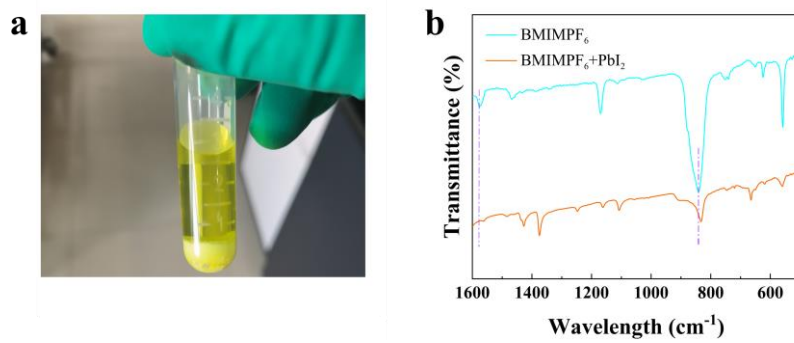

**Figure S7.** a) The photograph of white powder. b) The FTIR of BMIMPF<sub>6</sub> with or without PbI<sub>2</sub>.



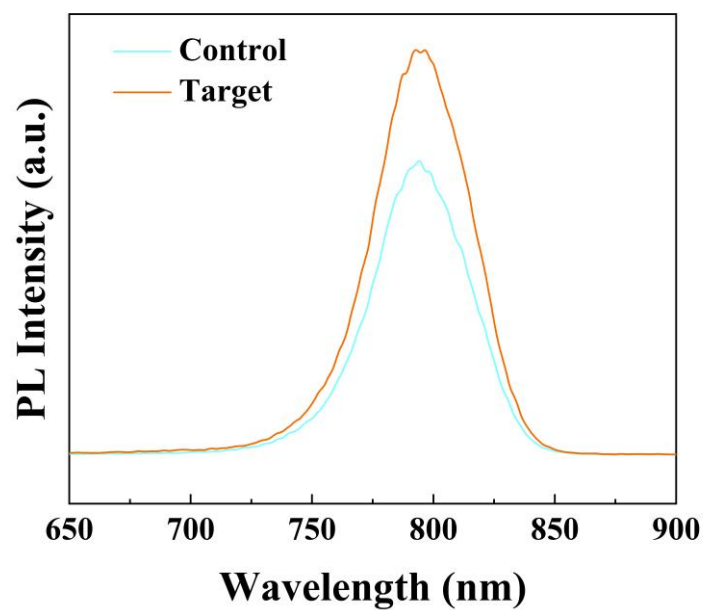

**Figure S8.** The PL spectra for control and target perovskite films which the excitation light is incident from the glass side.

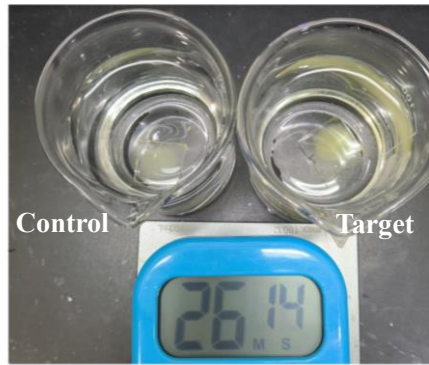

**Figure S9.** The photograph of perovskite in DI water.

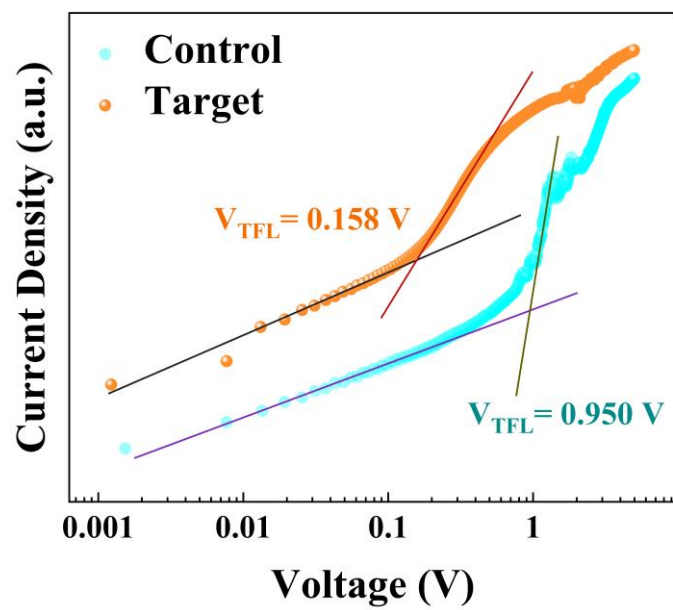

**Figure S10.** The SCLC measurement of the corresponding for electron-only devices.

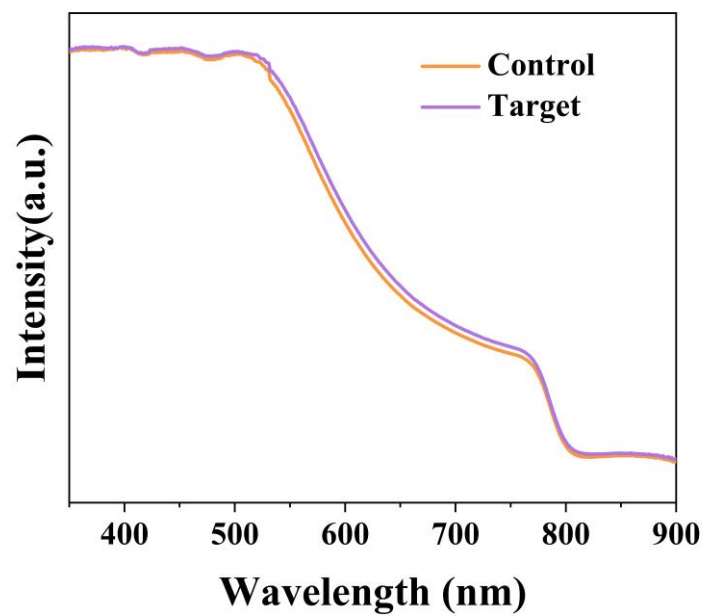

**Figure S11.** The UV-Vis spectra for the corresponding perovskite films.

**Table S1.** The PL lifetimes of the perovskite films with or without BMIMPF<sub>6</sub>

| <b>Sample</b>  | <b>A<sub>1</sub></b> | <b>τ<sub>1</sub> (ns)</b> | <b>A<sub>2</sub></b> | <b>τ<sub>2</sub> (ns)</b> | <b>A<sub>1</sub>/(A<sub>1</sub>+A<sub>2</sub>) (%)</b> | <b>τ<sub>avg</sub> (ns)</b> |
|----------------|----------------------|---------------------------|----------------------|---------------------------|--------------------------------------------------------|-----------------------------|
| <b>Control</b> | <b>0.2635</b>        | <b>38.61</b>              | <b>0.6669</b>        | <b>166.99</b>             | <b>28.3%</b>                                           | <b>121.54</b>               |
| <b>Target</b>  | <b>0.3993</b>        | <b>15.37</b>              | <b>0.5512</b>        | <b>75.43</b>              | <b>42.0%</b>                                           | <b>47.71</b>                |

**Table S2.** The  $J$ - $V$  parameters for control and target PSCs.

|           | $V_{oc}$ [V] | $J_{sc}$ [mA cm <sup>-2</sup> ] | FF    | PCE [%] | HI    |
|-----------|--------------|---------------------------------|-------|---------|-------|
| Target-R  | 1.194        | 22.55                           | 80.72 | 21.74   | 0.047 |
| Target-F  | 1.181        | 22.49                           | 78.04 | 20.72   |       |
| Control-R | 1.177        | 21.69                           | 76.50 | 19.52   | 0.073 |
| Control-F | 1.160        | 21.43                           | 72.83 | 18.10   |       |

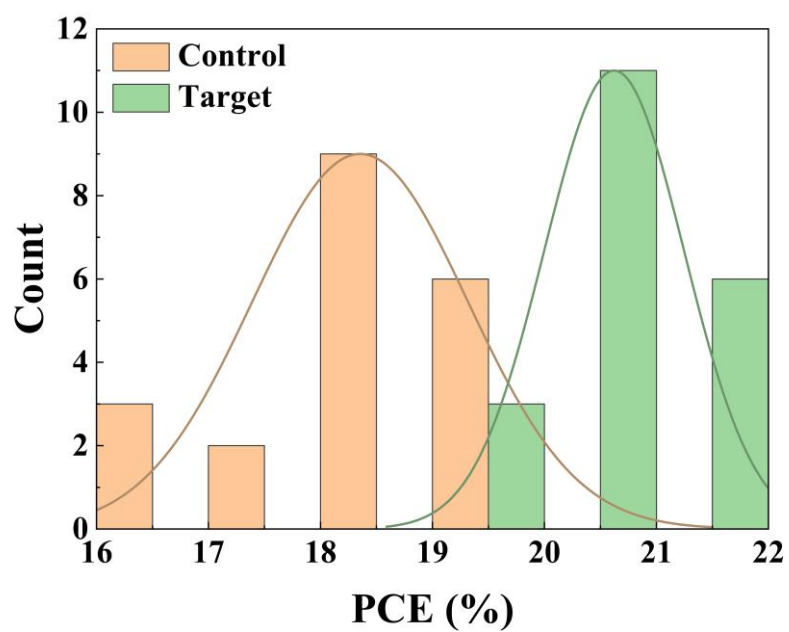

**Figure S12.** The PCE distribution for 20 devices.

**Table S3.** The statistical analysis of PCE (%) for control and target PSCs.

| <b>Device</b>  | <b>Control</b>       | <b>Target</b>        |
|----------------|----------------------|----------------------|
| 1              | 19.52                | 21.74                |
| 2              | 19.37                | 20.85                |
| 3              | 16.61                | 20.00                |
| 4              | 18.55                | 19.65                |
| 5              | 19.02                | 20.15                |
| 6              | 19.24                | 20.48                |
| 7              | 18.88                | 19.46                |
| 8              | 16.77                | 20.89                |
| 9              | 19.06                | 21.25                |
| 10             | 18.57                | 20.42                |
| 11             | 18.89                | 20.71                |
| 12             | 17.14                | 20.44                |
| 13             | 18.62                | 20.66                |
| 14             | 18.50                | 20.14                |
| 15             | 16.32                | 19.76                |
| 16             | 18.09                | 21.00                |
| 17             | 18.53                | 21.39                |
| 18             | 17.55                | 20.89                |
| 19             | 18.64                | 21.22                |
| 20             | 19.19                | 21.34                |
| <b>Average</b> | <b>18.35 ± 0.94%</b> | <b>20.62 ± 0.61%</b> |



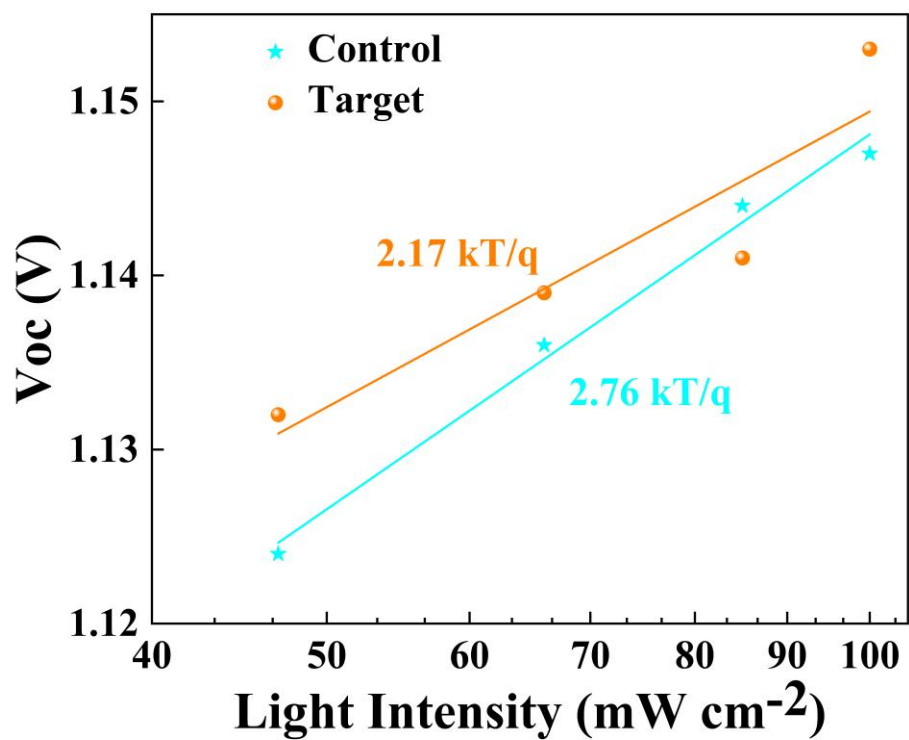

Figure S13. The  $V_{OC}$  versus light intensity for the corresponding device.

**Table S4.** The EIS parameters for control and target PSCs.

| <b>Device</b>  | <b><math>R_s</math></b> | <b><math>R_{CT}</math></b> |
|----------------|-------------------------|----------------------------|
| <b>Control</b> | <b>25.32</b>            | <b>88.61</b>               |
| <b>Taregt</b>  | <b>25.60</b>            | <b>18.89</b>               |

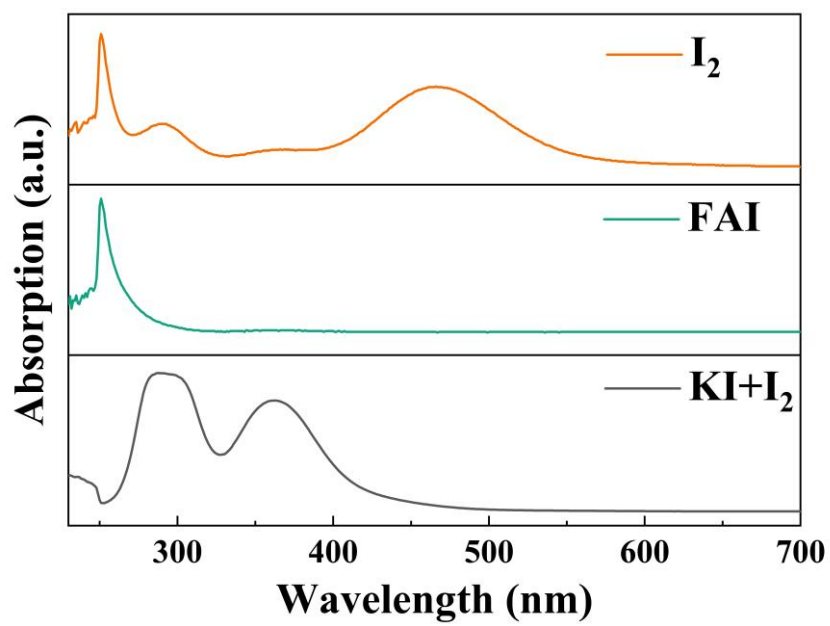

**Figure S14.** The light absorption of I<sub>2</sub>, FAI, and KI+I<sub>2</sub>.

**Table S5.** The normalized performance of PSCs kept in air.

(room temperature,  $\approx 25\%$  RH)

| <b>Time<br/>(h)</b> | <b>Normalized PCE of<br/>control device</b> | <b>Normalized PCE of<br/>target device</b> |
|---------------------|---------------------------------------------|--------------------------------------------|
| <b>0</b>            | <b>1</b>                                    | <b>1</b>                                   |
| <b>1464</b>         | <b>0.909</b>                                | <b>0.927</b>                               |
| <b>3528</b>         | <b>0.616</b>                                | <b>0.775</b>                               |
| <b>4128</b>         | <b>0.369</b>                                | <b>0.670</b>                               |

**Table S6.** The normalized performance of PSCs kept at 85 °C.

(ambient conditions,  $\approx 25\%$  RH)

| <b>Time<br/>(h)</b> | <b>Normalized PCE of<br/>control device</b> | <b>Normalized PCE of<br/>target device</b> |
|---------------------|---------------------------------------------|--------------------------------------------|
| <b>0</b>            | <b>1</b>                                    | <b>1</b>                                   |
| <b>12</b>           | <b>0.8879</b>                               | <b>1.0226</b>                              |
| <b>24</b>           | <b>0.6637</b>                               | <b>0.9537</b>                              |
| <b>36</b>           | <b>0.4433</b>                               | <b>0.7352</b>                              |
